# Supplementary material for: Simultaneous glycerol dehydration and in situ hydrogenolysis over Cu–Al oxide under an inert atmosphere
Source: Royal Society of Chemistry journal article supplement (doi:10.1039/c2gc35661a), 2012-01-01
Supplement: c2gc35661a.pdf [file c2gc35661a.pdf]

## Electronic Supplementary Information (ESI)

### Simultaneous glycerol dehydration and *in-situ* hydrogenolysis over Cu-Al oxide under an inert atmosphere

Rasika B. Mane and Chandrashekhar V. Rode\*

#### Experimental

X-ray photoelectron spectroscopy (XPS) data were collected on a VG Scientific ESCA-3000 spectrometer using a non-monochromatised Mg K $\alpha$  radiation (1253.6 eV) at a pressure of about  $1 \times 10^{-9}$  Torr (pass energy of 50 eV, electron takeoff angle 55) and overall resolution  $\sim 0.7$  eV determined from the full width at half maximum of the 4f $_{7/2}$  core level of gold surface. The error in the binding energy values were within 0.1 eV. The binding energy values were charge-corrected to the C $_{1s}$  signal (285.0 eV).

The chemical composition of the sample was determined by Energy Dispersive X-ray spectroscopy (EDX) attached to SEM (JEOL JSM 500).

Gas analysis was carried out using Chemito 8610 GC fitted with Porapac-Q column connected to TCD detector.

The Temperature-programmed desorption of CO $_2$  (CO $_2$ -TPD) was carried out in a Quantachrome Autosorb -1C sorption unit. 100 mg activated Cu-Al sample was heated at a rate of 10 °C min $^{-1}$  to 110 °C under He flow (30ml min $^{-1}$ ) and maintained at this temperature for 1 h in order to remove the surface impurities. After being cooled to room temperature under He flow, the sample was exposed to a mixture of 30 % CO $_2$ /He for 1.3 h. Subsequently, the sample was purged with He for 30 min and then heated to 700 °C at a rate of 10 °C min $^{-1}$ . Desorption of CO $_2$  was monitored by the mass spectrometry.

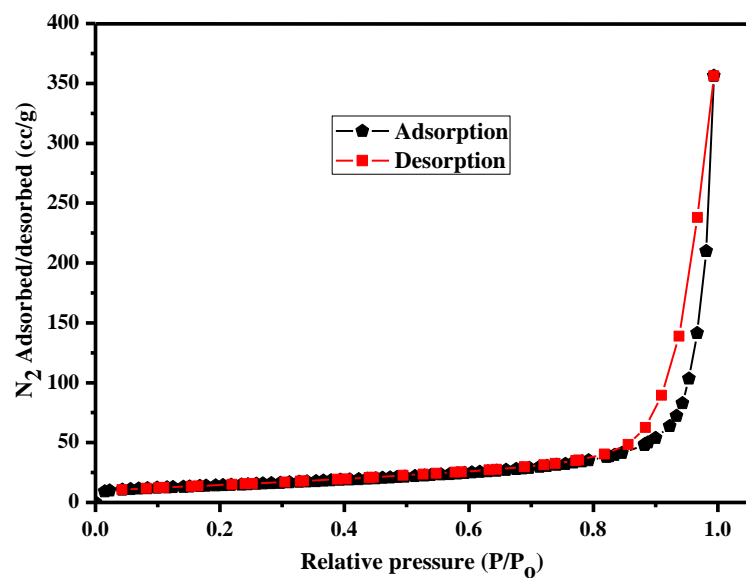

**Fig.1**  $N_2$  adsorption/desorption isotherm of activated Cu-Al catalyst.

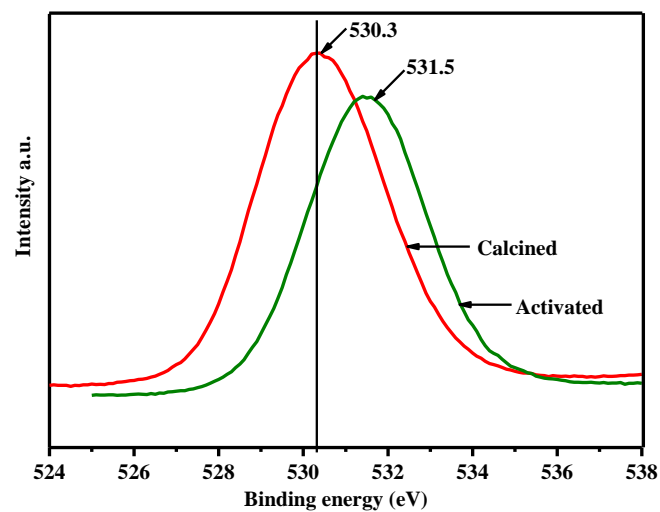

**Fig.2** O 1s spectra of the calcined and activated Cu-Al catalyst.

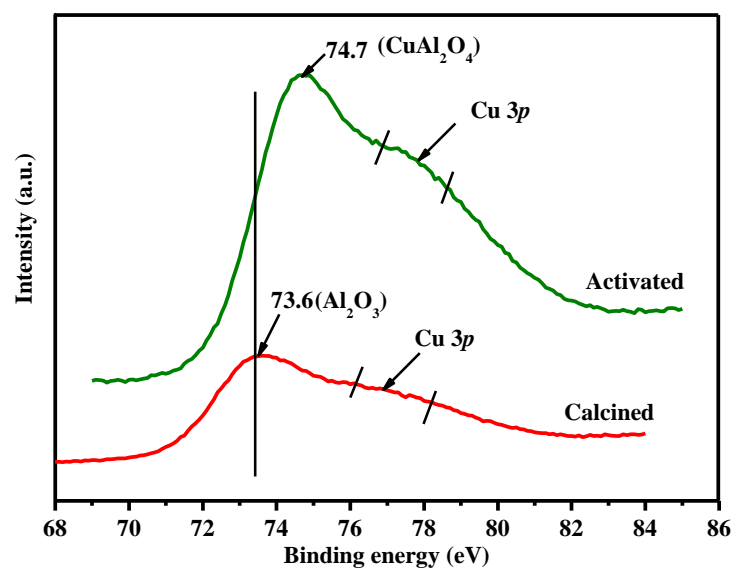

**Fig. 3** Al 2p spectra of the calcined and activated Cu-Al catalyst.

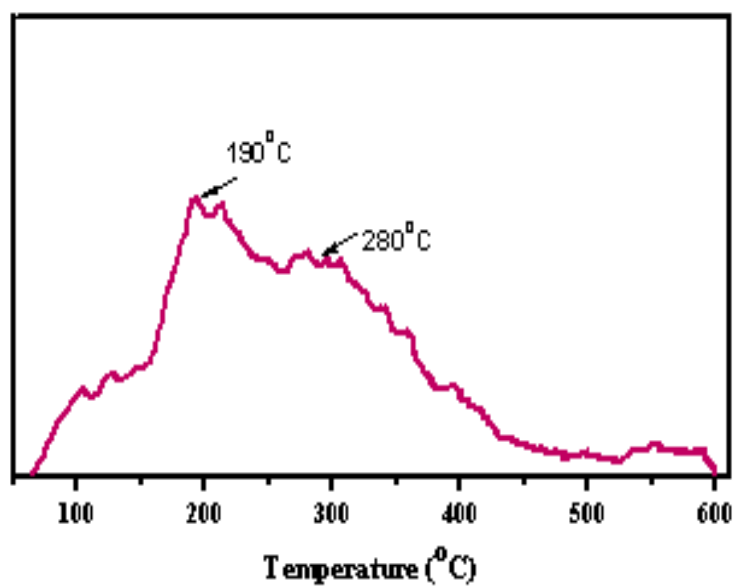

**Fig. 4** CO<sub>2</sub>-TPD profile of the activated Cu-Al catalyst.

**Table 1** Gas phase analysis

| Catalysts                                                                                                                                                                 | Substrate | Temperature | Gas phase composition (%) |                 |                 |
|---------------------------------------------------------------------------------------------------------------------------------------------------------------------------|-----------|-------------|---------------------------|-----------------|-----------------|
|                                                                                                                                                                           |           |             | H <sub>2</sub>            | CO <sub>2</sub> | CH <sub>4</sub> |
| Cu:Al (1:1) <sup>a</sup>                                                                                                                                                  | Glycerol  | 220         | 80                        | 20              | 0.0             |
| 20% Cu/Al <sub>2</sub> O <sub>3</sub> <sup>a</sup>                                                                                                                        | Glycerol  | 230         | 0.0                       | 0.0             | 0.0             |
| Al <sub>2</sub> O <sub>3</sub> <sup>a</sup>                                                                                                                               | Glycerol  | 230         | 0.0                       | 0.0             | 0.0             |
| 3%Pt/C <sup>a</sup>                                                                                                                                                       | Glycerol  | 220         | 86                        | 8               | 6               |
| Cu:Al (1:1) <sup>b</sup>                                                                                                                                                  | Glycerol  | 220         | 76                        | 24              | 0.0             |
| Cu:Al (1:1) <sup>b</sup>                                                                                                                                                  | Glycerol  | 230         | 80                        | 20              | 0.0             |
| Cu:Al (1:1) <sup>a</sup>                                                                                                                                                  | Acetol    | 220         | 0.0                       | 0.0             | 0.0             |
| Cu:Al (1:1) <sup>a</sup>                                                                                                                                                  | 1,2-PDO   | 220         | 100                       | 0.0             | 0.0             |
| <b>Reaction conditions:</b> <sup>a</sup> batch operation, reaction time, 3h. <sup>b</sup> continuous operation at GHSV= 513 h <sup>-1</sup> , LHSV = 1.53 h <sup>-1</sup> |           |             |                           |                 |                 |

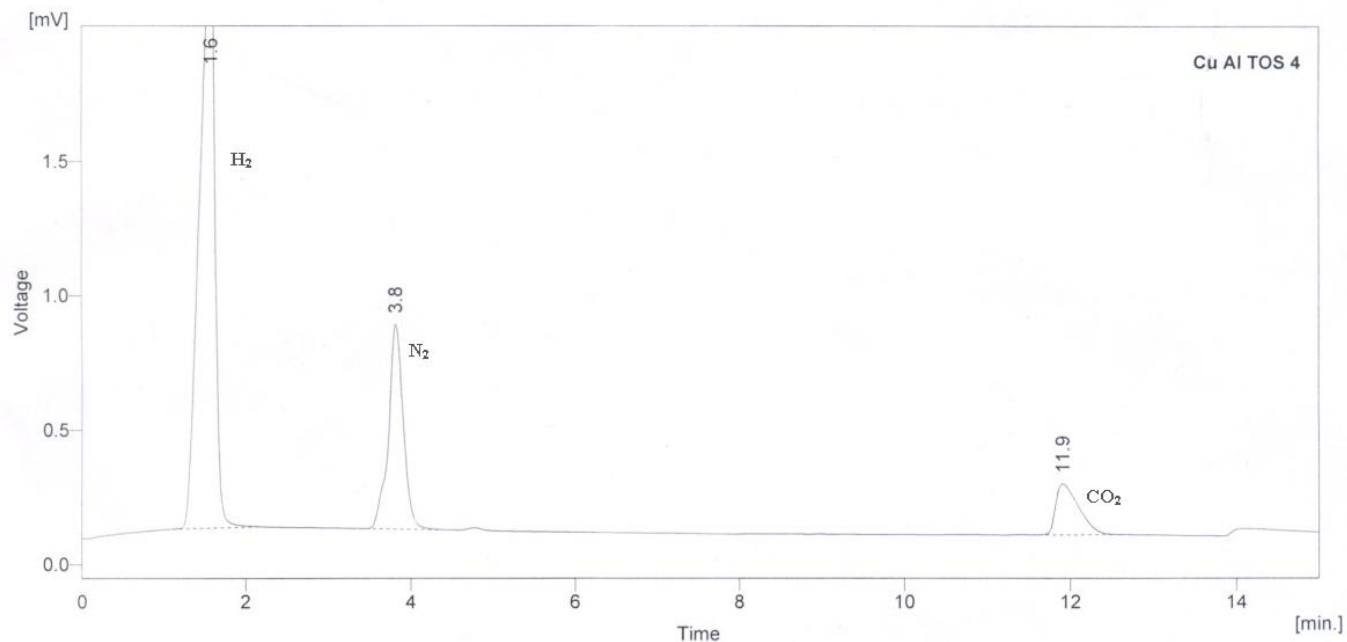

*Result Table*

|   | Reten. Time<br>[min] | Area<br>[mV.s] | Height<br>[mV] | Area<br>[%] | Height<br>[%] | W05<br>[min] |
|---|----------------------|----------------|----------------|-------------|---------------|--------------|
| 1 | 1.583                | 575.781        | 45.897         | 68.4        | 70.7          | 0.20         |
| 2 | 3.820                | 192.816        | 15.253         | 22.9        | 23.5          | 0.18         |
| 3 | 11.907               | 73.018         | 3.807          | 8.7         | 5.9           | 0.31         |
|   | Total                | 841.615        | 64.957         | 100.0       | 100.0         |              |

**Fig. 5** GC of gas phase composition (Cu-Al catalyst).

\* N<sub>2</sub> was used as an inert in the reaction hence the compositions of other gases were calculated by excluding N<sub>2</sub>.

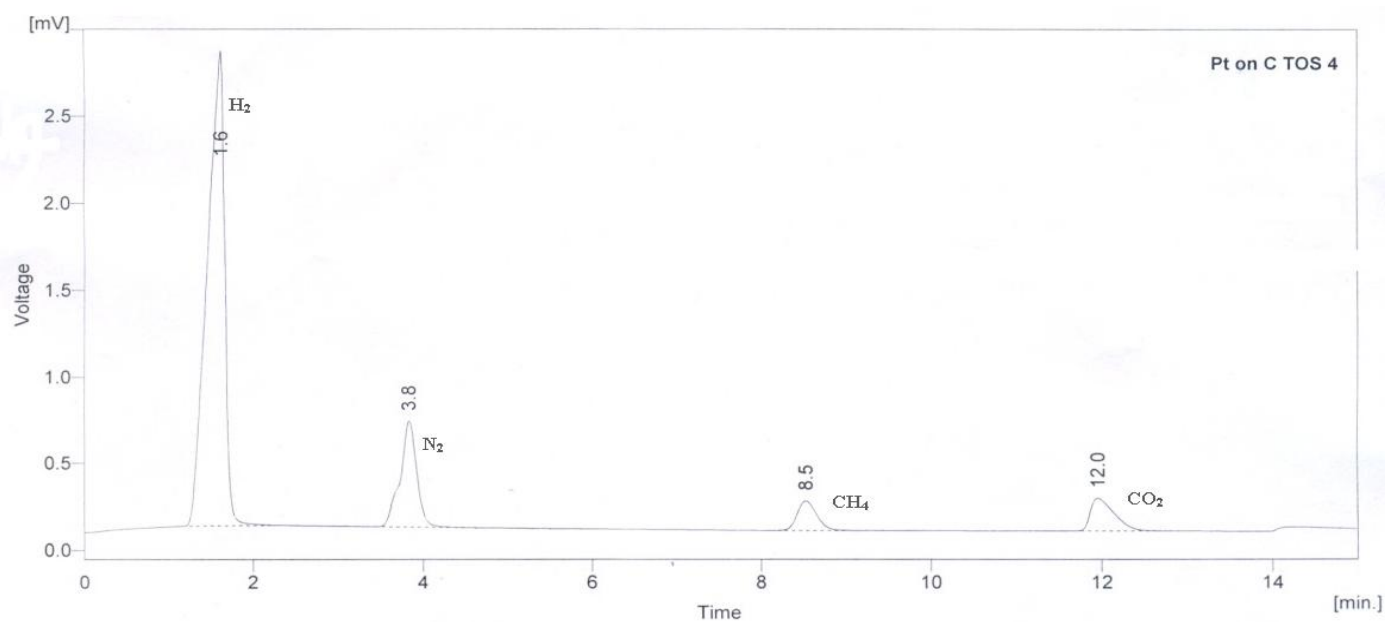

Result Table

|       | Reten. Time<br>[min] | Area<br>[mV.s] | Height<br>[mV] | Area<br>[%] | Height<br>[%] | W05<br>[min] |
|-------|----------------------|----------------|----------------|-------------|---------------|--------------|
| 1     | 1.623                | 787.095        | 54.745         | 72.9        | 73.8          | 0.24         |
| 2     | 3.833                | 166.526        | 12.223         | 15.4        | 16.5          | 0.19         |
| 3     | 8.520                | 54.057         | 3.410          | 5.0         | 4.6           | 0.25         |
| 4     | 11.950               | 72.082         | 3.757          | 6.7         | 5.1           | 0.31         |
| Total |                      | 1079.761       | 74.135         | 100.0       | 100.0         |              |

**Fig. 6** GC of gas phase composition (3% Pt/C) .

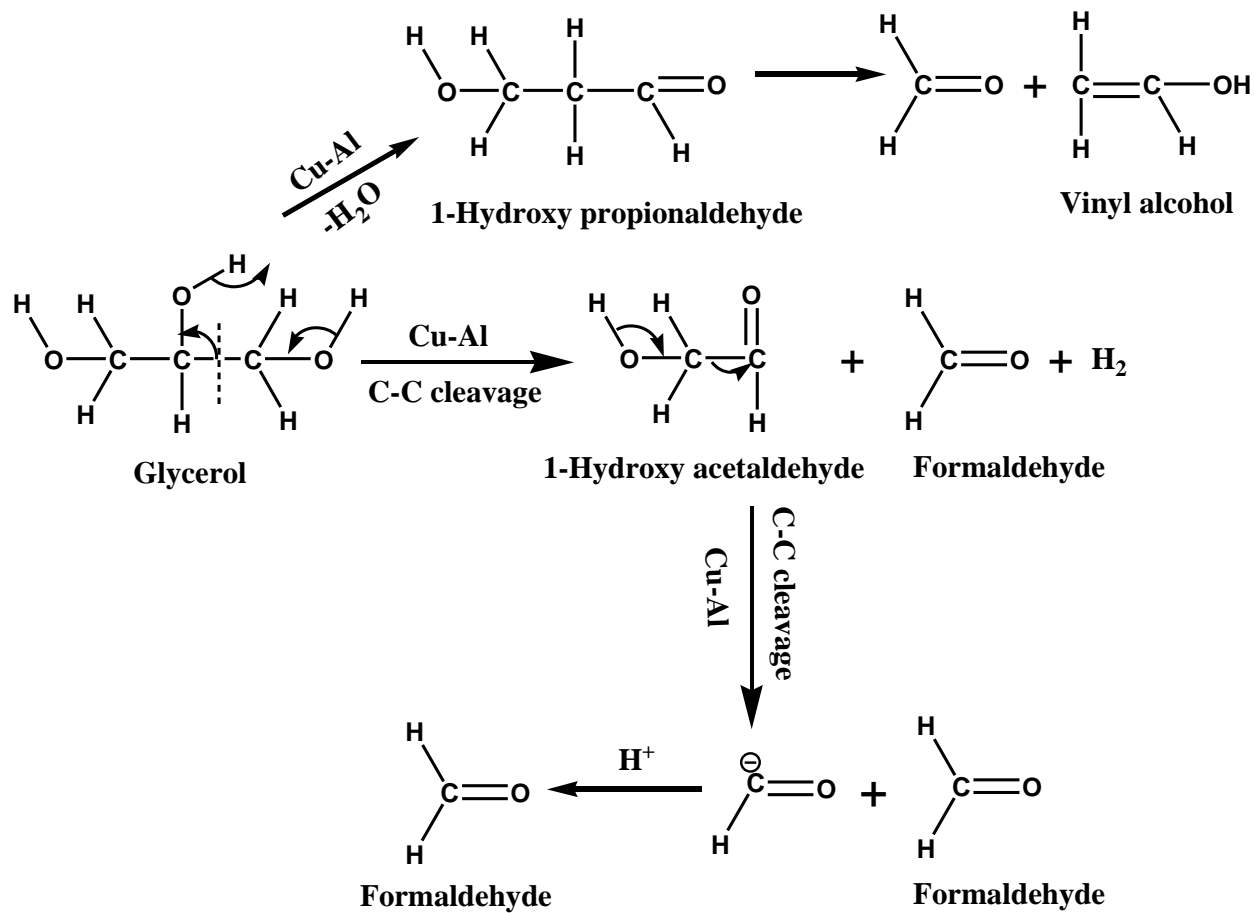

**Scheme 1** Formaldehyde formation by C-C cleavage of glycerol under dehydration condition

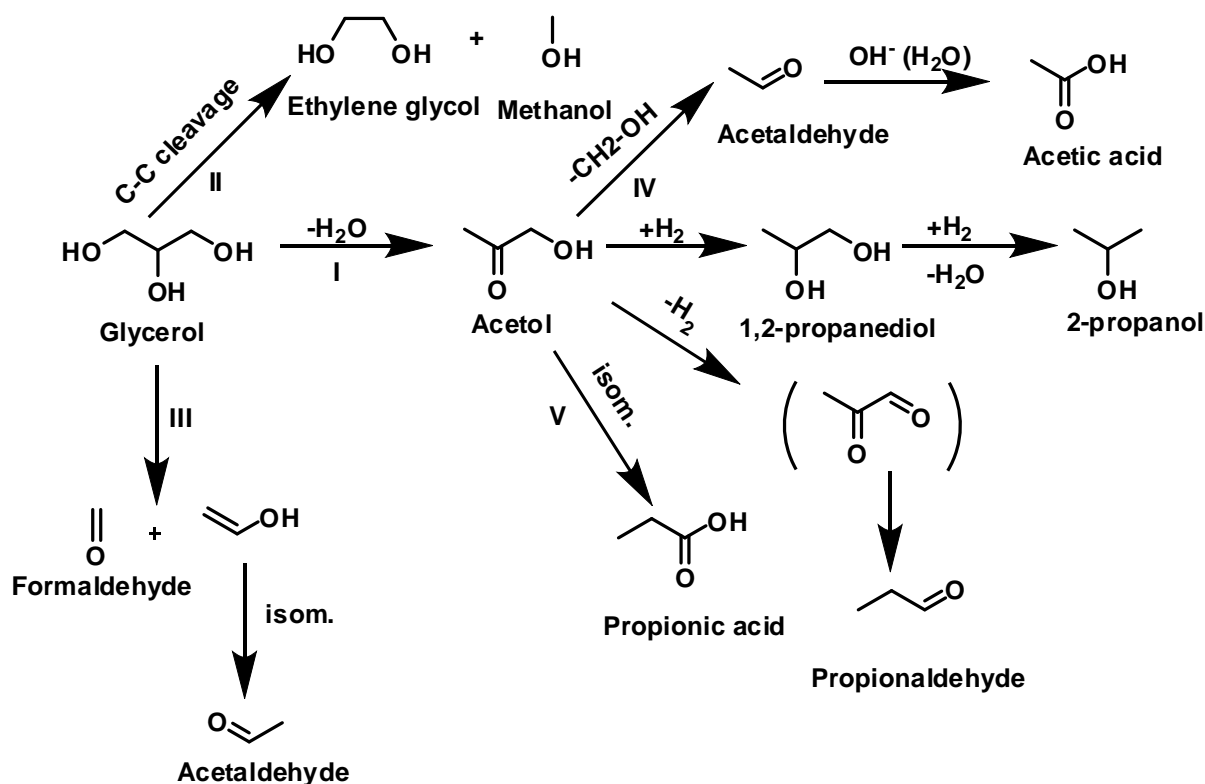

**Scheme 2** Schematic representation of reaction pathways during autogeneous hydrogenolysis of aqueous glycerol under inert atmosphere. Pathway I is desirable for glycerol dehydration to give acetol followed by its further hydrogenation to 1,2-PDO and its excess hydrogenation leads to undesirable 2-propanol formation. Pathways II, III, IV present the undesirable C-C cleavage leading to formation of ethylene glycol, formaldehyde, and acetaldehyde. Pathway V is the acetol isomerization giving propionic acid.

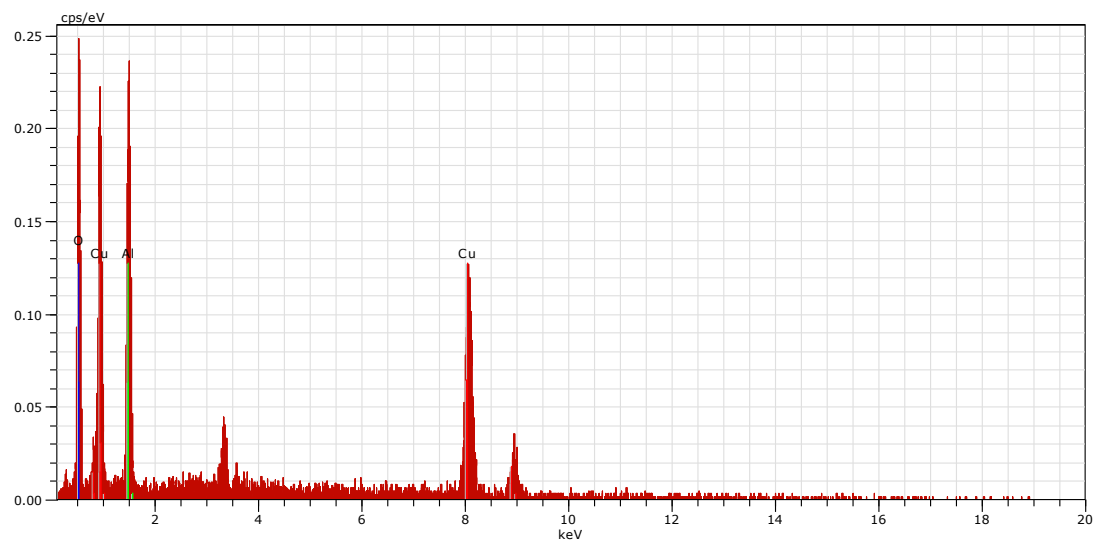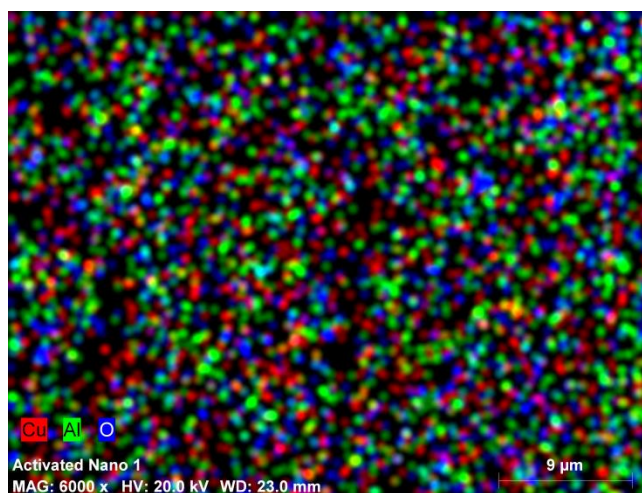

**Fig. 7** EDX of Cu-Al catalyst.

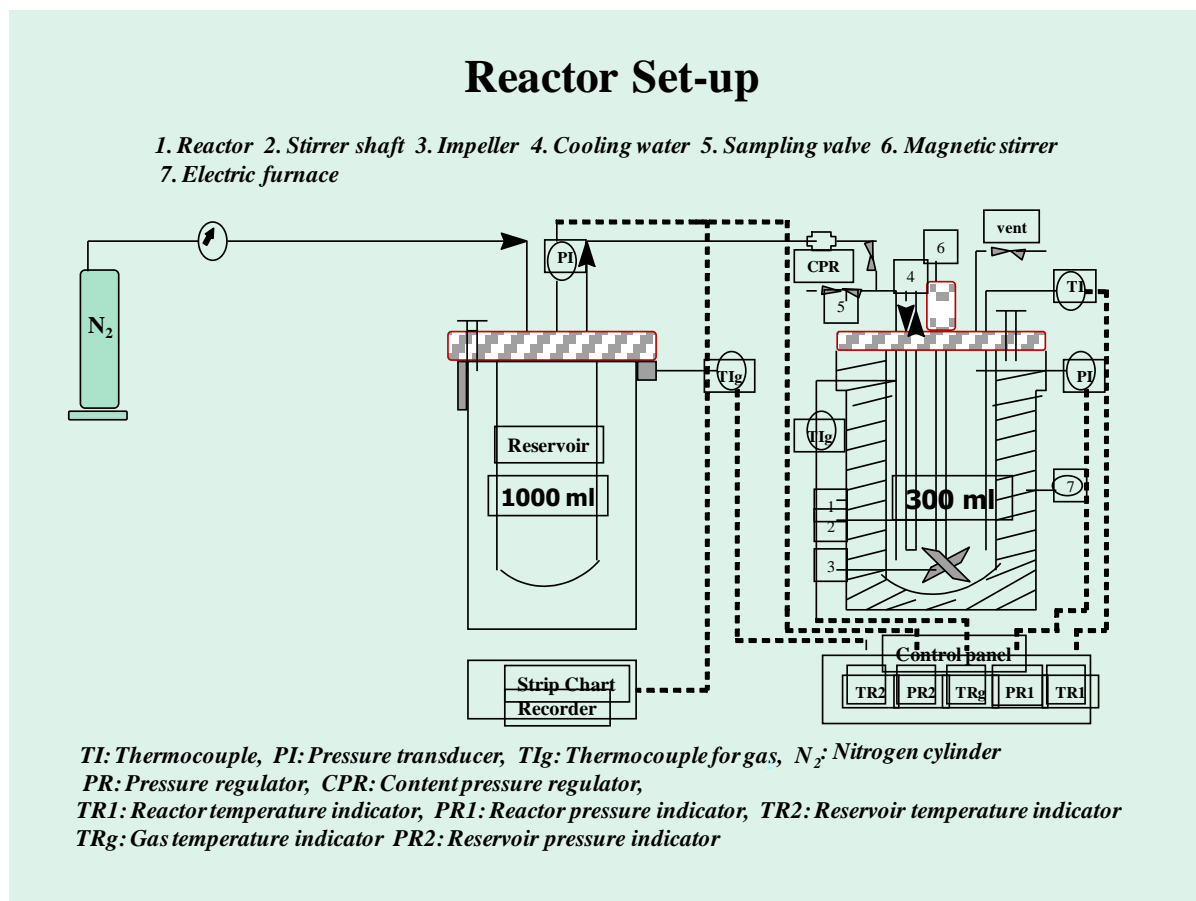

**Fig. 8** Schematic of a batch reactor set-up.

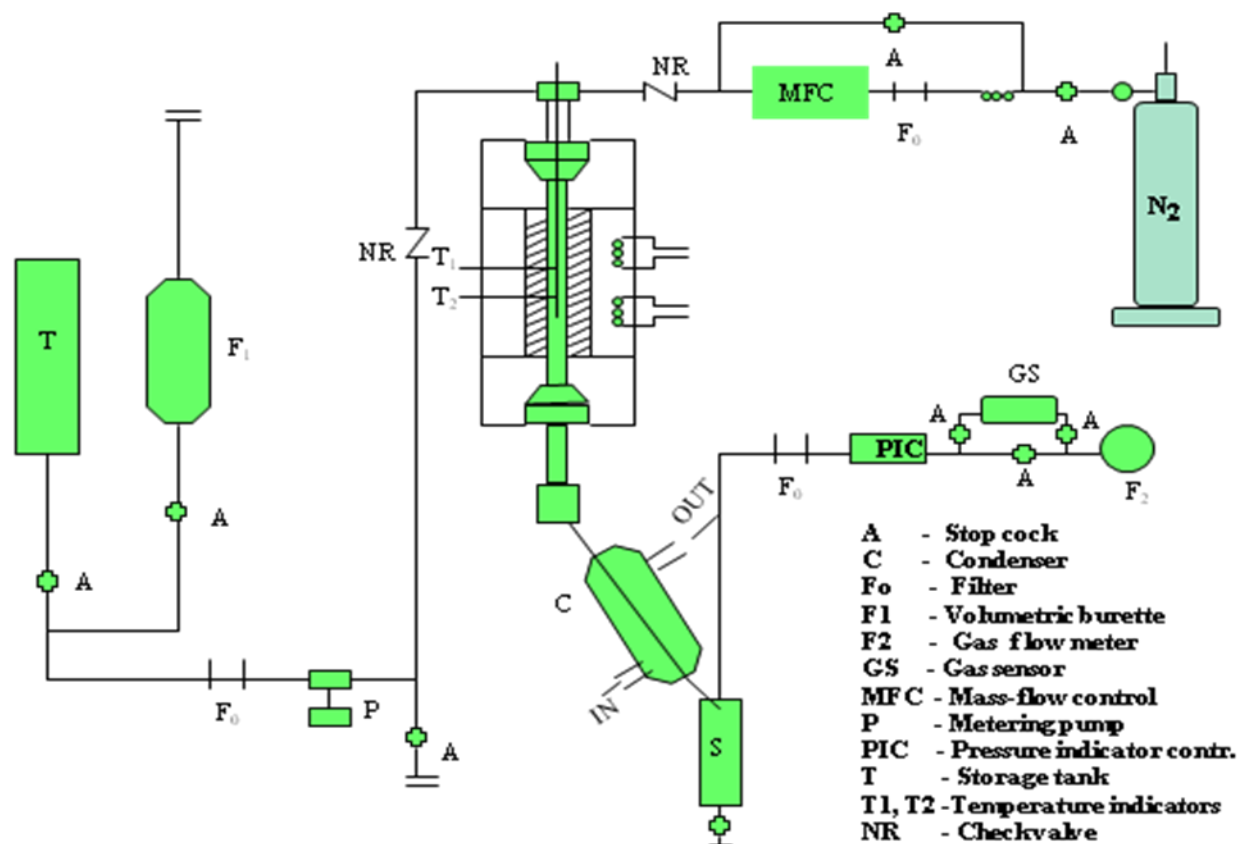

**Fig. 9** Schematic of a continuous fixed bed reactor set-up.
